# Supplementary material for: The Transcriptomic and Bioinformatic Characterizations of Iron Acquisition and Heme Utilization in Avibacterium paragallinarum in Response to Iron-Starvation
Source: Front Microbiol. 2021 Mar 4;12:610196. doi: 10.3389/fmicb.2021.610196 (PMC7970244; doi:10.3389/fmicb.2021.610196)
Supplement: Supplementary file 6 [file Data_Sheet_5.XLS]

## Sheet: Data Set S5
Pathway ID	Pathway Description	Gene Num	Ratio in study	Ratio in pop	P-value	Corrected P-value
map00240	Pyrimidine metabolism	3	3/39	39/1513	0.0764	0.4202
map00230	Purine metabolism	4	4/39	53/1513	0.0445	0.49
map02024	Quorum sensing	1	1/39	29/1513	0.5344	0.5879
map00760	Nicotinate and nicotinamide metabolism	1	1/39	10/1513	0.2304	0.6337
map00730	Thiamine metabolism	1	1/39	10/1513	0.2304	0.6337
map02020	Two-component system	1	1/39	24/1513	0.4683	0.6439
map00970	Aminoacyl-tRNA biosynthesis	1	1/39	24/1513	0.4683	0.6439
map02010	ABC transporters	2	2/39	84/1513	0.6488	0.6488
map00450	Selenocompound metabolism	1	1/39	8/1513	0.1889	0.6928
map00010	Glycolysis / Gluconeogenesis	1	1/39	23/1513	0.454	0.7134
map00030	Pentose phosphate pathway	1	1/39	19/1513	0.393	0.7205
		17
