# Supplementary material for: The Transcriptomic and Bioinformatic Characterizations of Iron Acquisition and Heme Utilization in Avibacterium paragallinarum in Response to Iron-Starvation
Source: Front Microbiol. 2021 Mar 4;12:610196. doi: 10.3389/fmicb.2021.610196 (PMC7970244; doi:10.3389/fmicb.2021.610196)
Supplement: Supplementary file 9 [file Data_Sheet_8.XLS]

## Sheet: Data Set S8
sRNA ID	Target Gene ID	Gene Type	Description	Database
sRNA0022	VY92_RS00150	mRNA	DNA helicase RecQ	RNAphybrid
	VY92_RS00335	mRNA	ABC transporter ATP-binding protein	RNAphybrid
	VY92_RS00575	mRNA	-	RNAphybrid
	VY92_RS00585	mRNA	-	RNAphybrid
	VY92_RS00760	mRNA	DNA-binding protein	RNAphybrid
	VY92_RS01490	mRNA	-	RNAphybrid
	VY92_RS01500	mRNA	-	RNAphybrid
	VY92_RS01505	mRNA	-	RNAphybrid
	VY92_RS01970	mRNA	L-fucose mutarotase	RNAphybrid
	VY92_RS02075	mRNA	nucleotidyltransferase domain-containing protein	RNAphybrid
	VY92_RS02155	mRNA	met regulon transcriptional regulator MetJ	RNAphybrid
	VY92_RS02235	mRNA	hypothetical protein	RNAphybrid
	VY92_RS02400	mRNA	DNA repair protein RecO	RNAphybrid
	VY92_RS02655	mRNA	IS110 family transposase	RNAphybrid
	VY92_RS02720	mRNA	two-component sensor histidine kinase	RNAphybrid
	VY92_RS02955	mRNA	sulfurtransferase complex subunit TusC	RNAphybrid
	VY92_RS03515	mRNA	TIGR03750 family conjugal transfer protein	RNAphybrid
	VY92_RS03800	mRNA	50S ribosomal protein L33	RNAphybrid
	VY92_RS03810	mRNA	JAB domain-containing protein	RNAphybrid
	VY92_RS03835	mRNA	cAMP-activated global transcriptional regulator CRP	RNAphybrid
	VY92_RS04030	mRNA	hypothetical protein	RNAphybrid
	VY92_RS04065	mRNA	hypothetical protein	RNAphybrid
	VY92_RS04085	mRNA	DUF3277 domain-containing protein	RNAphybrid
	VY92_RS04135	mRNA	phage baseplate protein	RNAphybrid
	VY92_RS04265	mRNA	head stabilization protein	RNAphybrid
	VY92_RS04460	mRNA	DNA ligase	RNAphybrid
	VY92_RS04640	mRNA	-	RNAphybrid
	VY92_RS04645	mRNA	-	RNAphybrid
	VY92_RS04705	mRNA	N-acetyltransferase	RNAphybrid
	VY92_RS05510	mRNA	aspartate aminotransferase family protein	RNAphybrid
	VY92_RS05560	mRNA	-	RNAphybrid
	VY92_RS05565	mRNA	-	RNAphybrid
	VY92_RS05680	mRNA	hypothetical protein	RNAphybrid
	VY92_RS05725	mRNA	Fic family protein	RNAphybrid
	VY92_RS05750	mRNA	ABC transporter permease	RNAphybrid
	VY92_RS05930	mRNA	GTPase HflX	RNAphybrid
	VY92_RS06155	mRNA	hypothetical protein	RNAphybrid
	VY92_RS07050	mRNA	DUF1043 domain-containing protein	RNAphybrid
	VY92_RS07075	mRNA	hypothetical protein	RNAphybrid
	VY92_RS07185	mRNA	sel1 repeat family protein	RNAphybrid
	VY92_RS07320	mRNA	CidB/LrgB family autolysis modulator	RNAphybrid
	VY92_RS07510	mRNA	glycosyltransferase family 2 protein	RNAphybrid
	VY92_RS07515	mRNA	N-acetyltransferase	RNAphybrid
	VY92_RS07615	mRNA	hypothetical protein	RNAphybrid
	VY92_RS07620	mRNA	autotransporter outer membrane beta-barrel domain-containing protein	RNAphybrid
	VY92_RS07720	mRNA	Lon protease family protein	RNAphybrid
	VY92_RS08540	mRNA	spermidine/putrescine ABC transporter permease PotB	RNAphybrid
	VY92_RS08690	mRNA	antibiotic biosynthesis monooxygenase	RNAphybrid
	VY92_RS08715	mRNA	hypothetical protein	RNAphybrid
	VY92_RS09215	mRNA	transcriptional regulator MraZ	RNAphybrid
	VY92_RS09320	mRNA	bifunctional chorismate mutase/prephenate dehydratase	RNAphybrid
	VY92_RS09365	mRNA	histidine-type phosphatase	RNAphybrid
	VY92_RS09785	mRNA	fumarate reductase subunit FrdC	RNAphybrid
	VY92_RS09790	mRNA	succinate dehydrogenase/fumarate reductase iron-sulfur subunit	RNAphybrid
	VY92_RS09870	mRNA	-	RNAphybrid
	VY92_RS09875	mRNA	-	RNAphybrid
	VY92_RS10145	mRNA	-	RNAphybrid
	VY92_RS10150	mRNA	-	RNAphybrid
	VY92_RS10155	mRNA	-	RNAphybrid
	VY92_RS10500	mRNA	tRNA pseudouridine(13) synthase TruD	RNAphybrid
	VY92_RS10725	mRNA	autotransporter domain-containing protein	RNAphybrid
	VY92_RS10915	mRNA	-	RNAphybrid
	VY92_RS10920	mRNA	-	RNAphybrid
	VY92_RS10940	mRNA	-	RNAphybrid
	VY92_RS10945	mRNA	-	RNAphybrid
	VY92_RS11850	mRNA	IS30 family transposase ISAeca1	RNAphybrid
	VY92_RS11935	mRNA	phage holin%2C lambda family	RNAphybrid
	VY92_RS11980	mRNA	DUF1828 domain-containing protein	RNAphybrid
	VY92_RS12075	mRNA	phage holin%2C lambda family	RNAphybrid
	VY92_RS12125	mRNA	-	RNAphybrid
	VY92_RS12355	mRNA	hypothetical protein	RNAphybrid
	VY92_RS12600	mRNA	hypothetical protein	RNAphybrid
sRNA0080	VY92_RS01490	mRNA	-	RNAphybrid
	VY92_RS03785	mRNA	MurR/RpiR family transcriptional regulator	RNAphybrid
	VY92_RS04095	mRNA	tape measure domain-containing protein	RNAphybrid
	VY92_RS04640	mRNA	-	RNAphybrid
	VY92_RS04645	mRNA	-	RNAphybrid
	VY92_RS05165	mRNA	copper-translocating P-type ATPase	RNAphybrid
	VY92_RS06080	mRNA	-	RNAphybrid
	VY92_RS06500	mRNA	-	RNAphybrid
	VY92_RS10150	mRNA	-	RNAphybrid
	VY92_RS10395	mRNA	hypothetical protein	RNAphybrid
	VY92_RS10940	mRNA	-	RNAphybrid
	VY92_RS12090	mRNA	hypothetical protein	RNAphybrid
sRNA0084	VY92_RS00560	mRNA	site-specific integrase	RNAphybrid
	VY92_RS01225	mRNA	PhzF family phenazine biosynthesis protein	RNAphybrid
	VY92_RS01670	mRNA	molybdopterin-guanine dinucleotide biosynthesis protein B	RNAphybrid
	VY92_RS02095	mRNA	3'(2')%2C5'-bisphosphate nucleotidase	RNAphybrid
	VY92_RS02285	mRNA	phage antirepressor Ant	RNAphybrid
	VY92_RS02720	mRNA	two-component sensor histidine kinase	RNAphybrid
	VY92_RS03285	mRNA	YhcH/YjgK/YiaL family protein	RNAphybrid
	VY92_RS03335	mRNA	YggU family protein	RNAphybrid
	VY92_RS04240	mRNA	hypothetical protein	RNAphybrid
	VY92_RS05145	mRNA	formate dehydrogenase-N subunit alpha	RNAphybrid
	VY92_RS05450	mRNA	guanylate kinase	RNAphybrid
	VY92_RS05510	mRNA	aspartate aminotransferase family protein	RNAphybrid
	VY92_RS07370	mRNA	-	RNAphybrid
	VY92_RS07770	mRNA	tRNA pseudouridine(38-40) synthase TruA	RNAphybrid
	VY92_RS09330	mRNA	3-phenylpropionate MFS transporter	RNAphybrid
	VY92_RS09875	mRNA	-	RNAphybrid
	VY92_RS10030	mRNA	-	RNAphybrid
	VY92_RS10350	mRNA	ribonuclease R	RNAphybrid
	VY92_RS10500	mRNA	tRNA pseudouridine(13) synthase TruD	RNAphybrid
	VY92_RS10900	mRNA	chloride channel protein EriC	RNAphybrid
	VY92_RS10915	mRNA	-	RNAphybrid
	VY92_RS11815	mRNA	heme-binding protein	RNAphybrid
	VY92_RS11970	mRNA	heme-binding protein	RNAphybrid
	VY92_RS12090	mRNA	hypothetical protein	RNAphybrid
	VY92_RS12130	mRNA	-	RNAphybrid
	VY92_RS12515	mRNA	hypothetical protein	RNAphybrid
	VY92_RS12570	mRNA	NADH-flavin reductase	RNAphybrid
	VY92_RS12600	mRNA	hypothetical protein	RNAphybrid
	VY92_RS12625	mRNA	hypothetical protein	RNAphybrid
	VY92_RS12645	mRNA	hypothetical protein	RNAphybrid
sRNA0103	VY92_RS00400	mRNA	hypothetical protein	RNAphybrid
	VY92_RS01225	mRNA	PhzF family phenazine biosynthesis protein	RNAphybrid
	VY92_RS03990	mRNA	sulfate transporter CysZ	RNAphybrid
	VY92_RS04265	mRNA	head stabilization protein	RNAphybrid
	VY92_RS04300	mRNA	hypothetical protein	RNAphybrid
	VY92_RS04540	mRNA	phosphatidate cytidylyltransferase	RNAphybrid
	VY92_RS04705	mRNA	N-acetyltransferase	RNAphybrid
	VY92_RS05750	mRNA	ABC transporter permease	RNAphybrid
	VY92_RS06745	mRNA	lipoprotein-releasing system transmembrane subunit LolE	RNAphybrid
	VY92_RS08690	mRNA	antibiotic biosynthesis monooxygenase	RNAphybrid
	VY92_RS08765	mRNA	GNAT family N-acetyltransferase	RNAphybrid
	VY92_RS08960	mRNA	hypothetical protein	RNAphybrid
	VY92_RS09025	mRNA	-	RNAphybrid
	VY92_RS09735	mRNA	UDP-N-acetylglucosamine 1-carboxyvinyltransferase	RNAphybrid
	VY92_RS09790	mRNA	succinate dehydrogenase/fumarate reductase iron-sulfur subunit	RNAphybrid
	VY92_RS10725	mRNA	autotransporter domain-containing protein	RNAphybrid
	VY92_RS11350	mRNA	-	RNAphybrid
	VY92_RS11815	mRNA	heme-binding protein	RNAphybrid
	VY92_RS11970	mRNA	heme-binding protein	RNAphybrid
	VY92_RS12625	mRNA	hypothetical protein	RNAphybrid
sRNA0004	VY92_RS00405	mRNA	DUF1367 domain-containing protein	RNAphybrid
	VY92_RS00500	mRNA	hypothetical protein	RNAphybrid
	VY92_RS00580	mRNA	-	RNAphybrid
	VY92_RS01030	mRNA	serine O-acetyltransferase	RNAphybrid
	VY92_RS01380	mRNA	orotate phosphoribosyltransferase	RNAphybrid
	VY92_RS01490	mRNA	-	RNAphybrid
	VY92_RS01500	mRNA	-	RNAphybrid
	VY92_RS02720	mRNA	two-component sensor histidine kinase	RNAphybrid
	VY92_RS03350	mRNA	-	RNAphybrid
	VY92_RS04265	mRNA	head stabilization protein	RNAphybrid
	VY92_RS05145	mRNA	formate dehydrogenase-N subunit alpha	RNAphybrid
	VY92_RS05165	mRNA	copper-translocating P-type ATPase	RNAphybrid
	VY92_RS05725	mRNA	Fic family protein	RNAphybrid
	VY92_RS05795	mRNA	YdcF family protein	RNAphybrid
	VY92_RS06055	mRNA	two-component system sensor histidine kinase QseC	RNAphybrid
	VY92_RS06885	mRNA	preprotein translocase	RNAphybrid
	VY92_RS07185	mRNA	sel1 repeat family protein	RNAphybrid
	VY92_RS09025	mRNA	-	RNAphybrid
	VY92_RS10075	mRNA	hypothetical protein	RNAphybrid
	VY92_RS10145	mRNA	-	RNAphybrid
	VY92_RS10150	mRNA	-	RNAphybrid
	VY92_RS10440	mRNA	MFS transporter	RNAphybrid
	VY92_RS10500	mRNA	tRNA pseudouridine(13) synthase TruD	RNAphybrid
	VY92_RS10690	mRNA	c-type cytochrome biogenesis protein CcmI	RNAphybrid
	VY92_RS10940	mRNA	-	RNAphybrid
	VY92_RS11350	mRNA	-	RNAphybrid
	VY92_RS11935	mRNA	phage holin%2C lambda family	RNAphybrid
	VY92_RS12075	mRNA	phage holin%2C lambda family	RNAphybrid
	VY92_RS12090	mRNA	hypothetical protein	RNAphybrid
	VY92_RS12130	mRNA	-	RNAphybrid
	VY92_RS12160	mRNA	-	RNAphybrid
	VY92_RS12515	mRNA	hypothetical protein	RNAphybrid
sRNA0036	VY92_RS00405	mRNA	DUF1367 domain-containing protein	RNAphybrid
	VY92_RS00500	mRNA	hypothetical protein	RNAphybrid
	VY92_RS00580	mRNA	-	RNAphybrid
	VY92_RS01030	mRNA	serine O-acetyltransferase	RNAphybrid
	VY92_RS01380	mRNA	orotate phosphoribosyltransferase	RNAphybrid
	VY92_RS01490	mRNA	-	RNAphybrid
	VY92_RS01500	mRNA	-	RNAphybrid
	VY92_RS02720	mRNA	two-component sensor histidine kinase	RNAphybrid
	VY92_RS03350	mRNA	-	RNAphybrid
	VY92_RS04265	mRNA	head stabilization protein	RNAphybrid
	VY92_RS05145	mRNA	formate dehydrogenase-N subunit alpha	RNAphybrid
	VY92_RS05165	mRNA	copper-translocating P-type ATPase	RNAphybrid
	VY92_RS05725	mRNA	Fic family protein	RNAphybrid
	VY92_RS05795	mRNA	YdcF family protein	RNAphybrid
	VY92_RS06055	mRNA	two-component system sensor histidine kinase QseC	RNAphybrid
	VY92_RS06885	mRNA	preprotein translocase	RNAphybrid
	VY92_RS07185	mRNA	sel1 repeat family protein	RNAphybrid
	VY92_RS09025	mRNA	-	RNAphybrid
	VY92_RS10075	mRNA	hypothetical protein	RNAphybrid
	VY92_RS10145	mRNA	-	RNAphybrid
	VY92_RS10150	mRNA	-	RNAphybrid
	VY92_RS10440	mRNA	MFS transporter	RNAphybrid
	VY92_RS10500	mRNA	tRNA pseudouridine(13) synthase TruD	RNAphybrid
	VY92_RS10690	mRNA	c-type cytochrome biogenesis protein CcmI	RNAphybrid
	VY92_RS10940	mRNA	-	RNAphybrid
	VY92_RS11350	mRNA	-	RNAphybrid
	VY92_RS11935	mRNA	phage holin%2C lambda family	RNAphybrid
	VY92_RS12075	mRNA	phage holin%2C lambda family	RNAphybrid
	VY92_RS12090	mRNA	hypothetical protein	RNAphybrid
	VY92_RS12130	mRNA	-	RNAphybrid
	VY92_RS12160	mRNA	-	RNAphybrid
	VY92_RS12515	mRNA	hypothetical protein	RNAphybrid
